# Supplementary material for: One-pot synthesis of reduced graphene oxide supported hollow Ag@Pt core–shell nanospheres with enhanced electrocatalytic activity for ethylene glycol oxidation
Source: Royal Society of Chemistry journal article supplement (doi:10.1039/c3ta13935b), 2013-11-22
Supplement: c3ta13935b.pdf [file c3ta13935b.pdf]

## Supporting Information

### **One-pot synthesis of reduced graphene oxide supported hollow Ag@Pt core-shell nanospheres with enhanced electrocatalytic activity for ethylene glycol oxidation**

Jie-Ning Zheng, Jing-Jing Lv, Shan-Shan Li, Meng-Wei Xue, Ai-Jun Wang,\* Jiu-Ju Feng\*

*College of Chemistry and Life Science, College of Geography and Environmental Science,  
Zhejiang Normal University, Jinhua 321004, China*

*\*Corresponding author: [jjfeng@zjnu.cn](mailto:jjfeng@zjnu.cn) (JJF), [ajwang@zjnu.cn](mailto:ajwang@zjnu.cn) (AJW); Tel./Fax: +86 579  
82282269.*

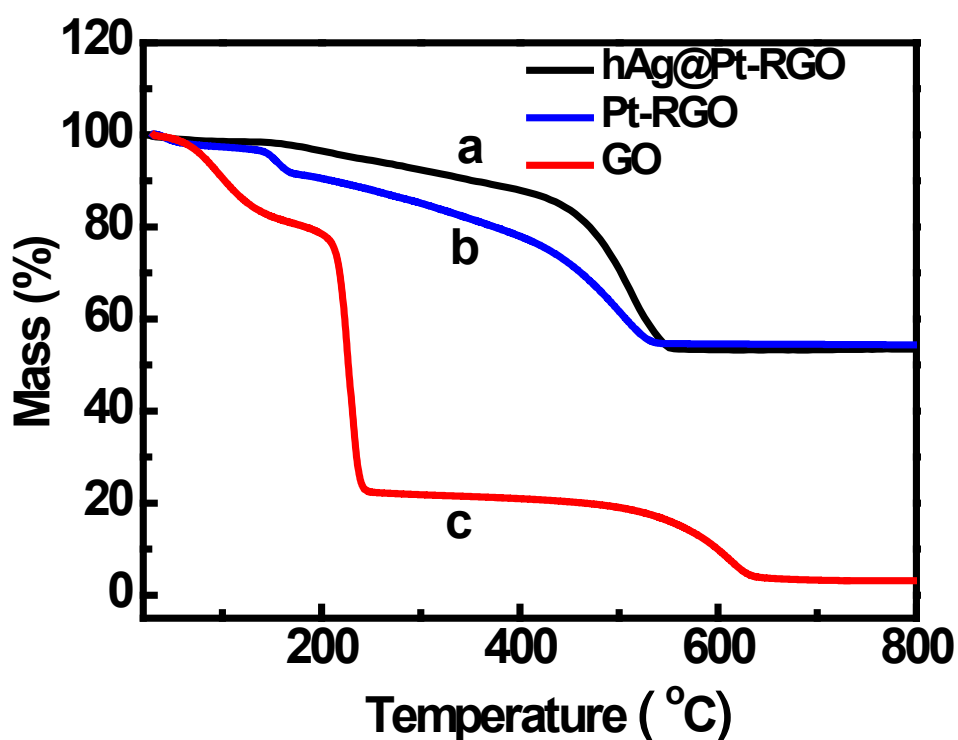

**Fig. S1.** Thermogravimetric analysis (TGA) of the hAg@Pt-RGO (curve a), Pt-RGO (curve b), and pure GO (curve c) samples.

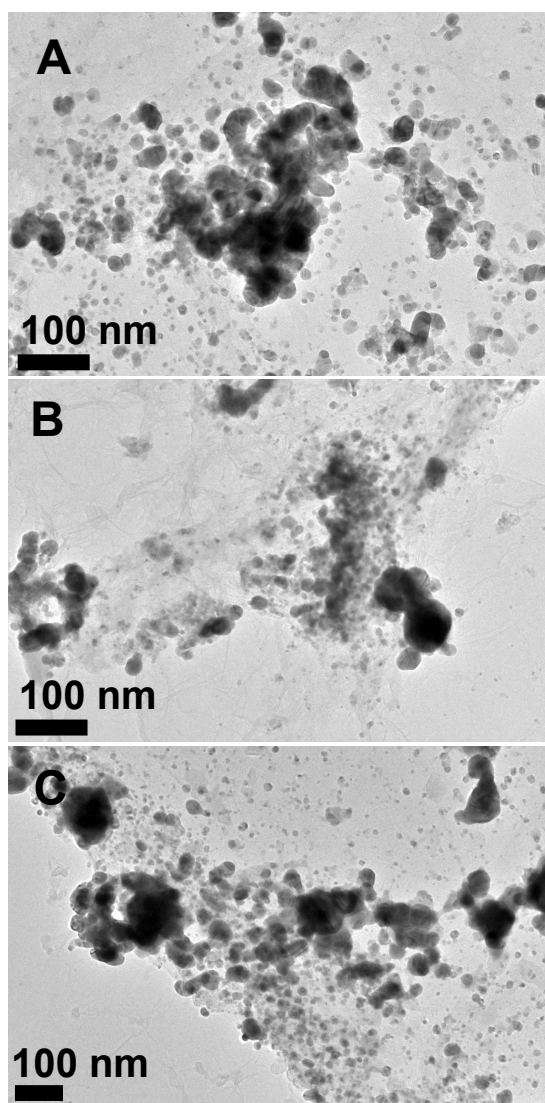

**Fig. S2.** TEM images of the products obtained without (A), and with 100 mg (B) and 600 mg (C) SDS.

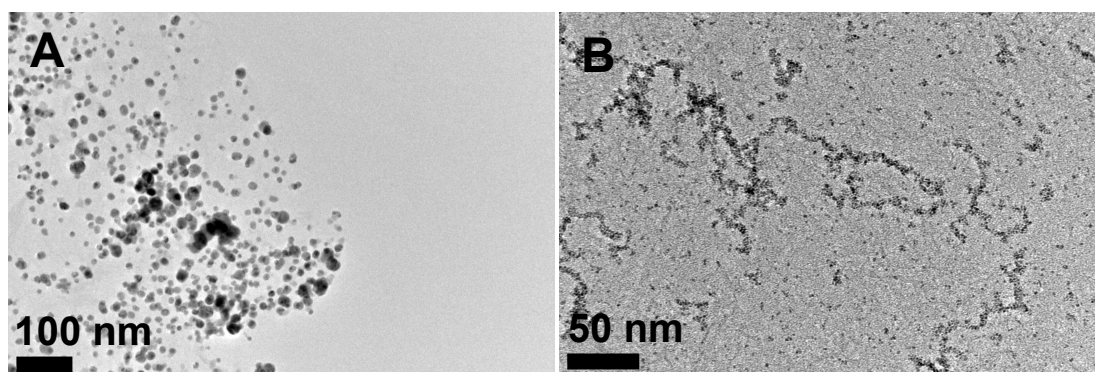

**Fig. S3.** TEM images of the Ag-RGO (A) and Pt-RGO (B) using individual  $\text{AgNO}_3$  and  $\text{H}_2\text{PtCl}_6$  as precursors, respectively.

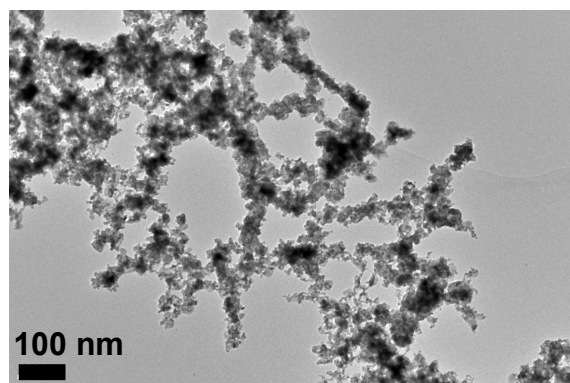

**Fig. S4.** TEM image of the PtAg hybrid nanocrystals in the absence of the GO.

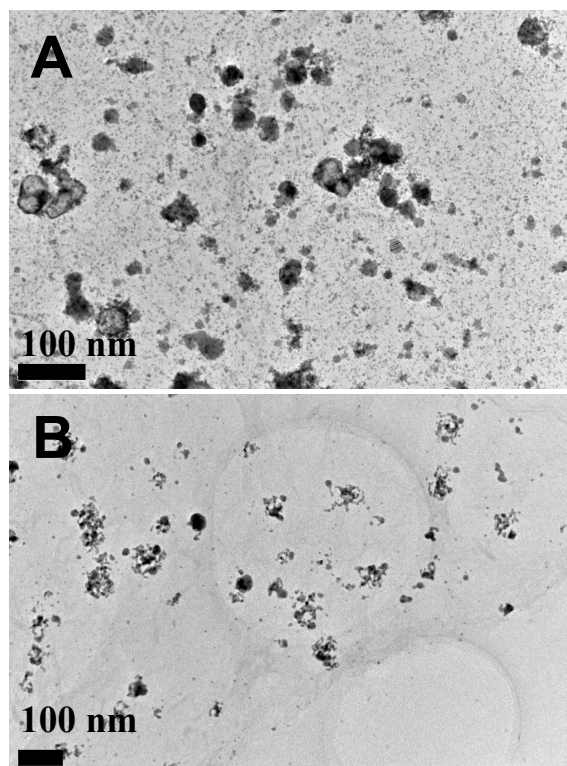

**Fig. S5.** TEM image of the PtAg-RGO prepared at 140 °C (A) and 180 °C (B).

**Table. 1S.** Exact Pt/Ag molar ratios of hAg@Pt–RGO and PtAg nanocrystals (without RGO as supports).

| <b>sample</b>                                               | <b>Precursor molar ratios of Pt/Ag</b> | <b>surface Pt/Ag molar ratios determined by XPS</b> |
|-------------------------------------------------------------|----------------------------------------|-----------------------------------------------------|
| PtAg nanocrystals obtained at 6 h (without RGO as supports) | 1:3                                    | 1 : 1.9                                             |
| Ag-Pt–RGO sample obtained at 1 h                            | 1:3                                    | 1 : 2.5                                             |
| Ag-Pt–RGO sample obtained at 3 h                            | 1:3                                    | 1 : 2.1                                             |
| hAg@Pt–RGO obtained at 6 h                                  | 1:3                                    | 1 : 1.6                                             |
| Ag-Pt–RGO sample obtained at 8 h                            | 1:3                                    | 1 : 1.4                                             |
